# Supplementary material for: Predicting Response to Neoadjuvant Hormonal Therapy and Prognostic Outcomes in High-Risk Prostate Cancer Using MRI-Based Radiomics
Source: Research Square preprint supplement (doi:10.21203/rs.3.rs-8655062/v1), 2026-02-13
Supplement: Supplementary file 1 [file 4b2acf9e77753f632a833b1b.docx]

**Supplementary Figure 1**

Typical images of MRI risk factors


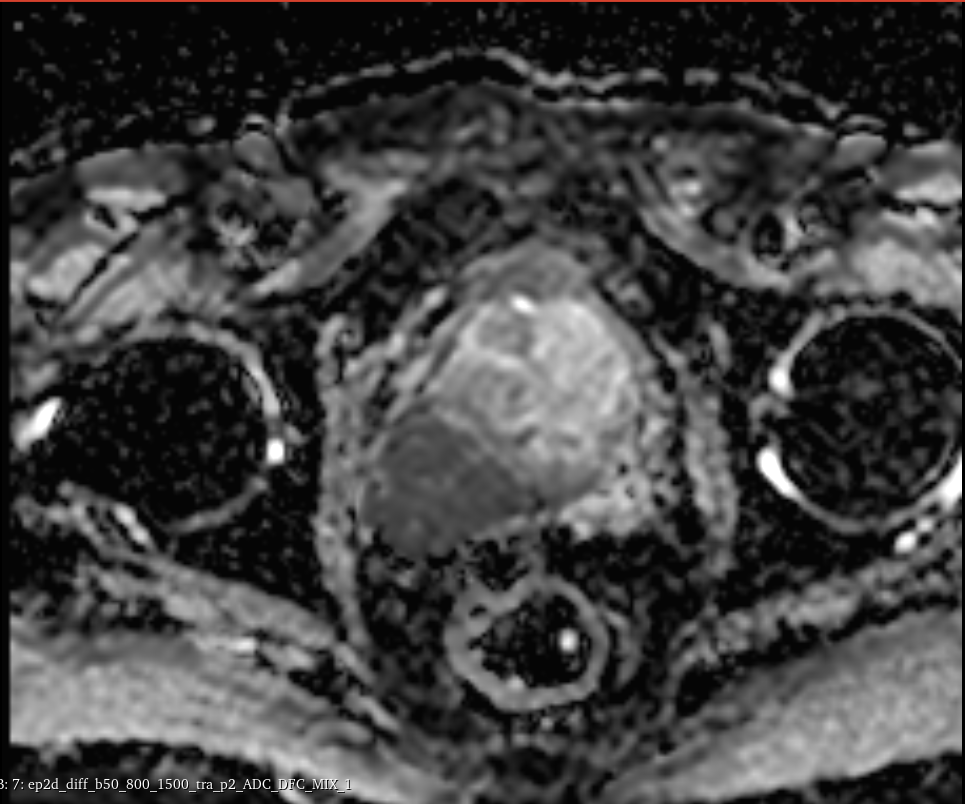

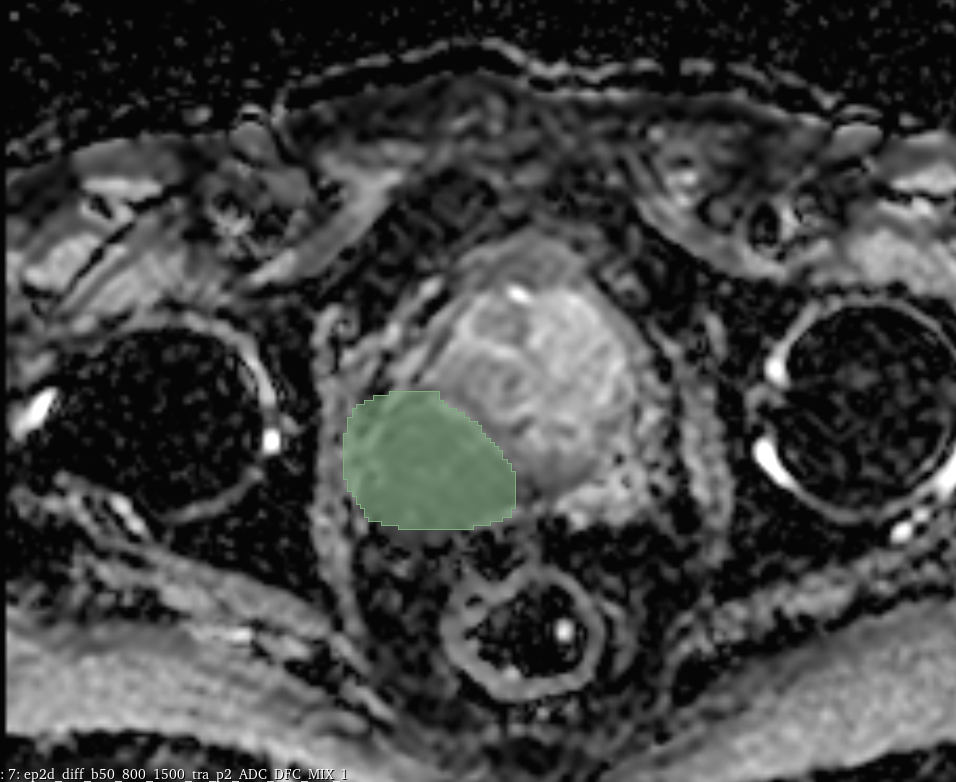


**Supplementary Figure 1,**SVI: seminal vesicle invasion

| **Supplementary Table 1. Detailed sequence parameters for prostate mpMRI** | | | |
| --- | --- | --- | --- |
| **Parameters** | **T2WI** | **T1W1** | **DWI** |
| **TR/TE (ms)** | **3500/101** | **700/11** | **3500/90** |
| **Layer thickness (mm)** | **3** | **3** | **3.5** |
| **Layer spacing (mm)** | **0.3** | **0.3** | **0.3** |
| **Field of view (mm × mm)** | **200×200** | **200×200** | **250×250** |
| **Matrix size** | **256×256** | **192×116** | **192×192** |
| **Other** | **-** | **-** | **b values =50 -800-1500 s/mm2** |
| **T2WI, T2 weighted images; T1W1, T1 weighted images; DWI, diffusion-weighted imaging; mpMRI, multiparametric magnetic resonance imaging; TR, Repetition time; TE, Time echo** | | | |

| **Supplementary Table 2. radiomics feature with ICC<0.75** | |
| --- | --- |
| **Sequences** | **Features** |
| ADC | | **Feature** | | --- | | original_shape_Maximum2DDiameterSlice | | original_shape_Maximum3DDiameter | | original_firstorder_Minimum | | original_gldm_LargeDependenceLowGrayLevelEmphasis | | original_gldm_LowGrayLevelEmphasis | | original_glrlm_LongRunLowGrayLevelEmphasis | | wavelet-LLH_gldm_LargeDependenceLowGrayLevelEmphasis | | wavelet-LLH_gldm_LowGrayLevelEmphasis | | wavelet-LLH_gldm_SmallDependenceLowGrayLevelEmphasis | | wavelet-LLH_glrlm_LongRunLowGrayLevelEmphasis | | wavelet-LLH_glrlm_LowGrayLevelRunEmphasis | | wavelet-LLH_glrlm_ShortRunLowGrayLevelEmphasis | | wavelet-LLH_glszm_LargeAreaLowGrayLevelEmphasis | | wavelet-LLH_glszm_LowGrayLevelZoneEmphasis | | wavelet-LLH_ngtdm_Busyness | | wavelet-LHL_gldm_LowGrayLevelEmphasis | | wavelet-LHL_gldm_SmallDependenceLowGrayLevelEmphasis | | wavelet-LHL_glrlm_LowGrayLevelRunEmphasis | | wavelet-LHL_glrlm_ShortRunLowGrayLevelEmphasis | | wavelet-LHL_glszm_LowGrayLevelZoneEmphasis | | wavelet-LHL_glszm_SmallAreaLowGrayLevelEmphasis | | wavelet-LHH_firstorder_Kurtosis | | wavelet-LHH_firstorder_Skewness | | wavelet-LHH_glszm_GrayLevelNonUniformityNormalized | | wavelet-HLH_firstorder_Skewness | | wavelet-HLH_glszm_SmallAreaLowGrayLevelEmphasis | | wavelet-HHL_firstorder_Mean | | wavelet-HHL_gldm_SmallDependenceLowGrayLevelEmphasis | | wavelet-HHL_glszm_SmallAreaLowGrayLevelEmphasis | | wavelet-HHH_firstorder_Kurtosis | | wavelet-HHH_firstorder_Mean | | wavelet-HHH_firstorder_Skewness | | wavelet-HHH_glcm_MCC | | wavelet-HHH_glszm_SmallAreaLowGrayLevelEmphasis | | wavelet-LLL_firstorder_Minimum | | wavelet-LLL_glcm_MaximumProbability | | wavelet-LLL_gldm_DependenceVariance | | wavelet-LLL_gldm_LargeDependenceLowGrayLevelEmphasis | | wavelet-LLL_gldm_LowGrayLevelEmphasis | | wavelet-LLL_glrlm_LongRunLowGrayLevelEmphasis | | wavelet-LLL_glrlm_LowGrayLevelRunEmphasis | | wavelet-LLL_glrlm_RunVariance | | wavelet-LLL_glrlm_ShortRunLowGrayLevelEmphasis | | wavelet-LLL_glszm_LargeAreaLowGrayLevelEmphasis | |
|  |  |

**Supplementary Table 3. The Radiomics Quality Score (RQS)**

| **Supplementary Table 3. The Radiomics Quality Score (RQS)** | | | | |
| --- | --- | --- | --- | --- |
| Criteria | | Points | Methods | Score |
| 1 | Image protocol quality - well-documented image protocols (for example, contrast, slice thickness, energy, etc.) and/or usage of public image protocols allow reproducibility/replicability | + 1 (if protocols are well-documented) | Imaging protocol is documented. | 1 |
| + 1 (if public protocol is used) |
| 2 | Multiple segmentations - possible actions are: segmentation by different physicians/algorithms/software, perturbing segmentations by (random) noise, segmentation at different breathing cycles. Analyse feature robustness to segmentation variabilities | + 1 | Image segmentation was firstly performed by by a MRI radiologists (Reader 1), and a total of 50 patients were randomly selected, their MRI images were dependently delineated again one month later by reader 1 and another senior radiologist to assess the  inter- and intra-observer reproducibility | 1 |
| 3 | Phantom study on all scanners - detect inter-scanner differences and vendor-dependent features. Analyse feature robustness to these sources of variability | + 1 | 0 | 0 |
| 4 | Imaging at multiple time points - collect images of individuals at additional time points. Analyse feature robustness to temporal variabilities (for example, organ movement, organ expansion/ shrinkage) | + 1 | 0 | 0 |
| 5 | Feature reduction or adjustment for multiple testing - decreases the risk of overfitting. Overfitting is inevitable if the number of features exceeds the number of samples. Consider feature robustness when selecting features | - 3 (if neither measure is implemented) | The Mann‒Whitney U test, Spearman’s correlation analysis and Boruta feature selection was gradually performed for selecting robust radiomics features with intraclass correlation coefficient (ICC) ≥ 0.75. | 3 |
| + 3 (if either measure is implemented) |
| 6 | Multivariable analysis with non radiomics features (for example, EGFR mutation) - is expected to provide a more holistic model. Permits correlating/inferencing between radiomics and non radiomics features | + 1 | The radiomics signature generated by the best classifier was defined as a new feature set and further used to construct a combined model with the joint of independent clinical-MRI features. | 1 |
| 7 | Detect and discuss biological correlates - demonstration of phenotypic differences (possibly associated with underlying gene–protein expression patterns) deepens understanding of radiomics and biology | + 1 | Detect and discuss biological correlates | 1 |
| 8 | Cut-off analyses - determine risk groups by either the median, a previously published cut-off or report a continuous risk variable. Reduces the risk of reporting overly optimistic results | + 1 | The receiver operating characteristic (ROC) curves were plotted and the best cut-off point was obtained by maximizing the Youden index in the training dataset and applied in three validation datasets to reduce the risk of overfitting and reporting overly optimistic results. | 1 |
| 9 | Discrimination statistics - report discrimination statistics (for example, C-statistic, ROC curve, AUC) and their statistical significance (for example, p-values, confidence intervals). One can also apply resampling method (for example, bootstrapping, cross-validation) | + 1 (if a discrimination statistic and its statistical significance are reported) | The area under the ROC curve (AUC) was calculated, the sensitivity, specificity and predictive accuracy were measured. The 95% confidence interval (CI) of the AUC was determined by the bootstrap resampling method with 1000 replicates. | 2 |
| + 1 (if a resampling method technique is also applied) |
| 10 | Calibration statistics - report calibration statistics (for example, Calibration-in-the-large/slope, calibration plots) and their statistical significance (for example, P-values, confidence intervals). One can also apply resampling method (for example, bootstrapping, cross-validation) | + 1 (if a calibration statistic and its statistical significance are reported) | a calibration statistic and its statistical significance are reported and a resampling method technique is also applied | 2 |
| + 1 (if a resampling method technique is also applied) |
| 11 | Prospective study registered in a trial database - provides the highest level of evidence supporting the clinical validity and usefulness of the radiomics biomarker | + 7 (for prospective validation of a radiomics signature in an appropriate trial) | 0 | 0 |
| 12 | Validation - the validation is performed without retraining and without adaptation of the cut-off value, provides crucial information with regard to credible clinical performance | - 5 (if validation is missing) | Our study, validation is based on a dataset from the same institute. | 2 |
| + 2 (if validation is based on a dataset from the same institute) |
| + 3 (if validation is based on a dataset from another institute) |
| + 4 (if validation is based on two datasets from two distinct institutes) |
| + 4 (if the study validates a previously published signature) |
| + 5 (if validation is based on three or more datasets from distinct institutes) |
| 13 | Comparison to ‘gold standard’ - assess the extent to which the model agrees with/is superior to the current ‘gold standard’ method (for example, TNM-staging for survival prediction). This comparison shows the added value of radiomics | + 2 | 0 | 0 |
| 14 | Potential clinical utility - report on the current and potential application of the model in a clinical setting (for example, decision curve analysis). | + 2 | Decision curve analysis (DCA) was performed to estimate the clinical usefulness of the models at different threshold probabilities. | 2 |
| 15 | Cost-effectiveness analysis - report on the cost-effectiveness of the clinical application (for example, QALYs generated) | + 1 | 0 | 0 |
| 16 | Open science and data - make code and data publicly available. Open science facilitates knowledge transfer and reproducibility of the study | + 1 (if scans are open source) | The scans are open source. the region of interest segmentation is performed on the open source (ITK-SNAP). The radiomics features are defined and publically available via pyradiomics. The code will be made available upon acceptance of the paper. | 4 |
| + 1 (if region of interest segmentations are open source) |
| + 1 (if code is open source) |
| + 1 (if radiomics features are calculated on a set of representative ROIs and the calculated features and representative ROIs are open source) |
| Total score of this study | | | | 20/36 |
